# Supplementary material
Source: PubMed Central journal article supplement (PMC3592573)
Supplement: NIHMS430743-supplement-1_si_001.pdf [file NIHMS430743-supplement-1_si_001.pdf]

**Table S1.** Resistances (G $\Omega$ ) measured across various reservoir pairs.

| Reservoir Pair | 25-nm channels               |                             |         | 50-nm channels               |                             |         | 100-nm channels              |                             |         |
|----------------|------------------------------|-----------------------------|---------|------------------------------|-----------------------------|---------|------------------------------|-----------------------------|---------|
|                | Before Transport Experiments | After Transport Experiments | Average | Before Transport Experiments | After Transport Experiments | Average | Before Transport Experiments | After Transport Experiments | Average |
| 1-2            | 2.33                         | 2.32                        | 2.33    | 2.11                         | 2.17                        | 2.14    | 2.08                         | 2.07                        | 2.08    |
| 1-3            | 11.05                        | 11.16                       | 11.11   | 7.80                         | 7.83                        | 7.82    | 4.20                         | 4.18                        | 4.19    |
| 1-4            | 10.31                        | 10.27                       | 10.29   | 7.06                         | 7.11                        | 7.09    | 3.40                         | 3.41                        | 3.41    |
| 2-3            | 12.18                        | 12.06                       | 12.12   | 8.29                         | 8.59                        | 8.44    | 4.93                         | 4.91                        | 4.92    |
| 2-4            | 11.49                        | 11.26                       | 11.38   | 7.65                         | 7.86                        | 7.76    | 4.16                         | 4.15                        | 4.16    |
| 3-4            | 2.20                         | 2.22                        | 2.21    | 2.05                         | 2.05                        | 2.05    | 2.00                         | 2.01                        | 2.01    |

**Table S2.** Individual channel resistances (G $\Omega$ ).

| Channel                        | 25-nm channels | 50 nm-channels | 100-nm channels |
|--------------------------------|----------------|----------------|-----------------|
| microchannel 1                 | 0.64           | 0.74           | 0.67            |
| microchannel 2                 | 1.69           | 1.40           | 1.41            |
| microchannel 3                 | 1.50           | 1.38           | 1.39            |
| microchannel 4                 | 0.70           | 0.67           | 0.62            |
| nanochannel array              | 8.97           | 5.68           | 2.13            |
| % voltage dropped across array | <b>81%</b>     | <b>73%</b>     | <b>51%</b>      |

We note that the measured resistances for the nanochannels are consistently less than those predicted from a simple calculation based on the nanochannel dimensions:

$$R_{nano} = \rho L_{nano} / A_{nano} \quad (S1)$$

where  $R_{nano}$  is the ionic resistance through the nanochannel,  $\rho$  is the solution resistivity (556  $\Omega$  cm for 2X TBE),  $L_{nano}$  is the nanochannel length, and  $A_{nano}$  is the nanochannel cross-sectional area. The devices used in these studies consisted of arrays of ten nanochannels with identical dimensions, such that the array resistance was ten-fold lower than that of a single nanochannel. The calculated resistances do not account for surface conductance contributions that are expected to be significant in nanochannels or for leakage currents associated with bonding defects or scratches in the substrate surface. The FIB milled nanochannels are spaced sufficiently to prevent networks of these leakage pathways that could complicate electric field determinations, as evidenced by images of fluorescent dye solutions in the nanochannels and by the constant velocity of DNA transport. These observations reinforce the importance of using the resistances measured in each of the electrolyte solutions used in the transport experiments rather than theoretical values and avoiding extrapolation across a range of ionic strengths.

As a final note, we consider the access resistance to the nanochannels. While the access resistance can be quite significant in the case of nanopores fabricated or assembled in thin membranes,<sup>1,2</sup> it is negligible for sufficiently long nanochannels such as the 50- $\mu$ m long channels used in this study. The total access resistance ( $R_{access}$ ) for the two ends of a cylindrical nanochannel is:

$$R_{access} = \rho / d_{nano} \quad (S2)$$

where  $d_{nano}$  is the nanochannel diameter.<sup>3</sup> In 2X TBE, the access resistances for the 25-nm, 50-nm, and 100-nm channels are approximately 0.22 G $\Omega$ , 0.11 G $\Omega$ , and 0.06 G $\Omega$ , respectively, or <0.3% of the resistance of a single nanochannel.

# Roughness of the Bottom Surface of a Focused Ion Beam Milled Nanochannel

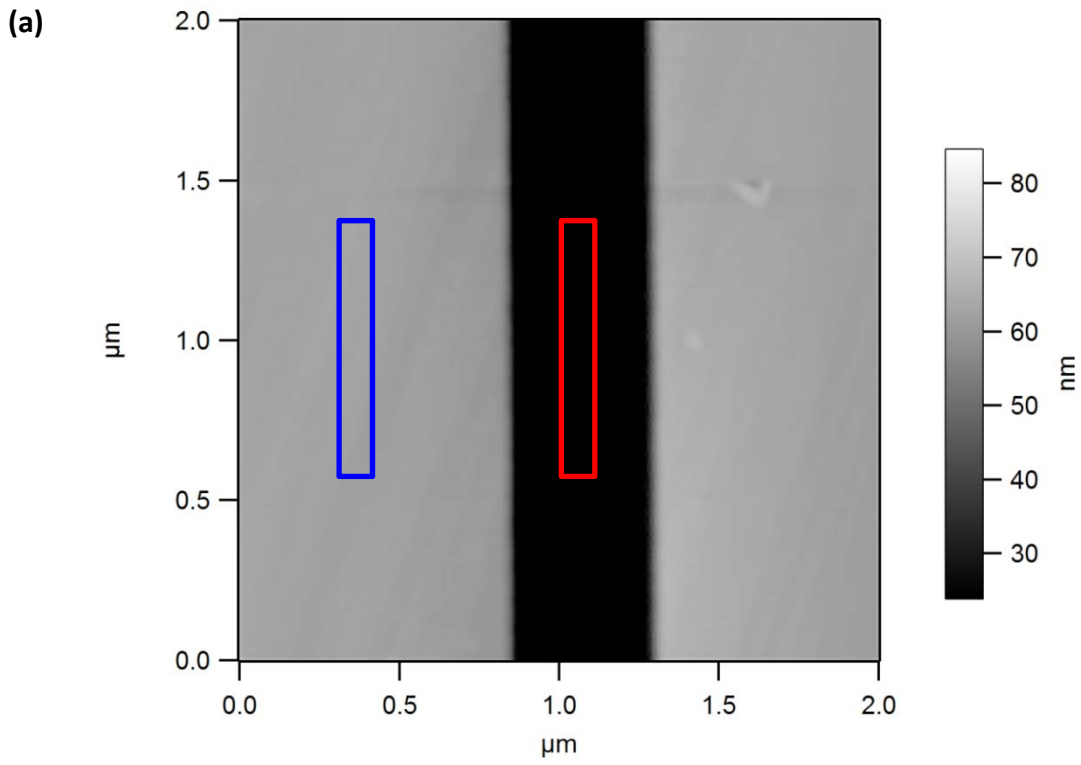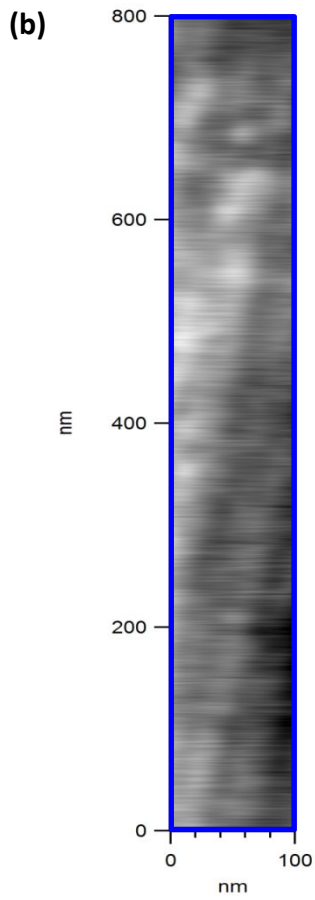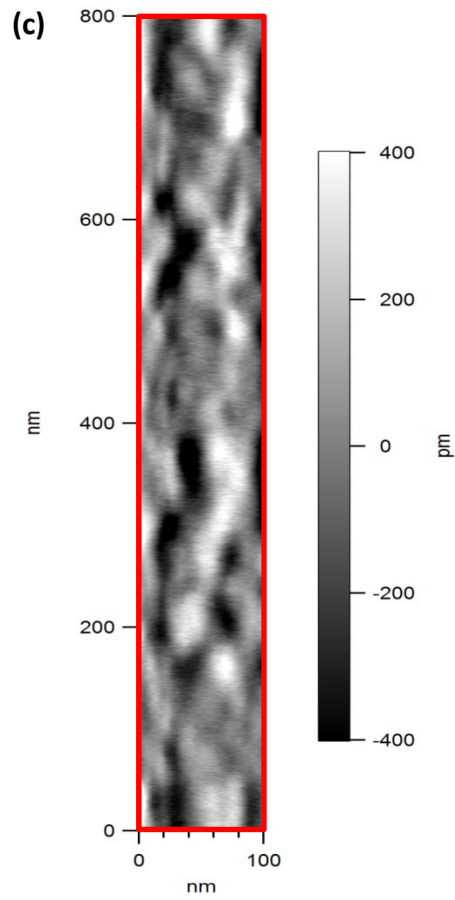

**Figure S2.** Atomic force microscopy (AFM) characterization of a 400-nm wide x 400-nm deep nanochannel fabricated by FIB milling in a quartz substrate. A channel of this size was chosen to ensure that the bottom surface of the nanochannel could be profiled without interference due to tip-wall interactions. Scans were performed in tapping mode on an Asylum Research MFP-3D atomic force microscope using a silicon tip with a tip radius ~2 nm (Applied Nanostructures). (a) Scan of the nanochannel and the adjacent quartz surface. (b) High resolution scan of the quartz surface adjacent to the nanochannel; rms roughness is 144 pm (c) High resolution scan of the bottom of the nanochannel; rms roughness is 196 pm.

## REFERENCES

- (1) Garaj, S.; Hubbard, W.; Reina, A.; Kong, J.; Branton, D.; Golovchenko, J. A. *Nature* **2010**, *467*, 190-193.
- (2) Wanunu, M.; Dadosh, T.; Ray, V.; Jin, J.; McReynolds, L.; Drndić, M. *Nat. Nanotechnol.* **2010**, *5*, 807-814.
- (3) Hall, J. E. *J. Gen. Physiol.* **1975**, *66*, 531-532.
